# Supplementary material for: New D—D—π-A triphenylamine–coumarin sensitizers for dye-sensitized solar cells
Source: Royal Society of Chemistry journal article supplement (doi:10.1039/c6pp00410e), 2017-04-25

## **New D-D- $\pi$ -A Triphenylamine-coumarin Sensitizers for Dye Sensitized Solar Cells**

Ji He, Yang Liu, Jianrong Gao, Liang Han\*

(College of Chemical Engineering, Zhejiang University of Technology, Hangzhou, 310032)

### **1. Fabrication of dye-sensitized solar cells**

The FTO glass was immersed in a detergent solution for 15 min, and then rinsed with water and ethanol. A main transparent layer with titania particles and a scattering layer with titania particles were deposited onto a conducting glass substrate using the screen printing technique, resulting in the TiO<sub>2</sub> electrodes (0.16 cm<sup>2</sup>). The TiO<sub>2</sub> electrodes were gradually heated under an air flow at 325 °C for 5 min, at 375 °C for 5 min, and at 450 °C for 15 min, and finally, at 500 °C for 15 min. After being cooled to room temperature, TiO<sub>2</sub> electrodes were immersed in a mixture of MeOH and CHCl<sub>3</sub> (V<sub>MeOH</sub>:V<sub>CHCl<sub>3</sub></sub>=1:10) solution containing the dye at 0.3 mM for 24 h to assure complete dye uptake. They were then rinsed with MeOH to remove excess dye and dried under a stream of nitrogen. Meanwhile, the counter electrodes were prepared by screen-printing a 50 nm Pt layer on the cleaned FTO plates. Open cells were fabricated in air by clamping different TiO<sub>2</sub> electrodes and platinized counter electrodes filling with the electrolyte. The electrolyte consists of the CH<sub>3</sub>CN solution of 0.3 M 1-methyl-3-propylimidazolium iodide (MPII), 0.03 M I<sub>2</sub>, 0.07 M LiI, 0.1 M guandine thiocyanate and 0.4 M 4-tert-butylpyridine (TBP).

## 2. Copies of $^{13}\text{C}$ NMR

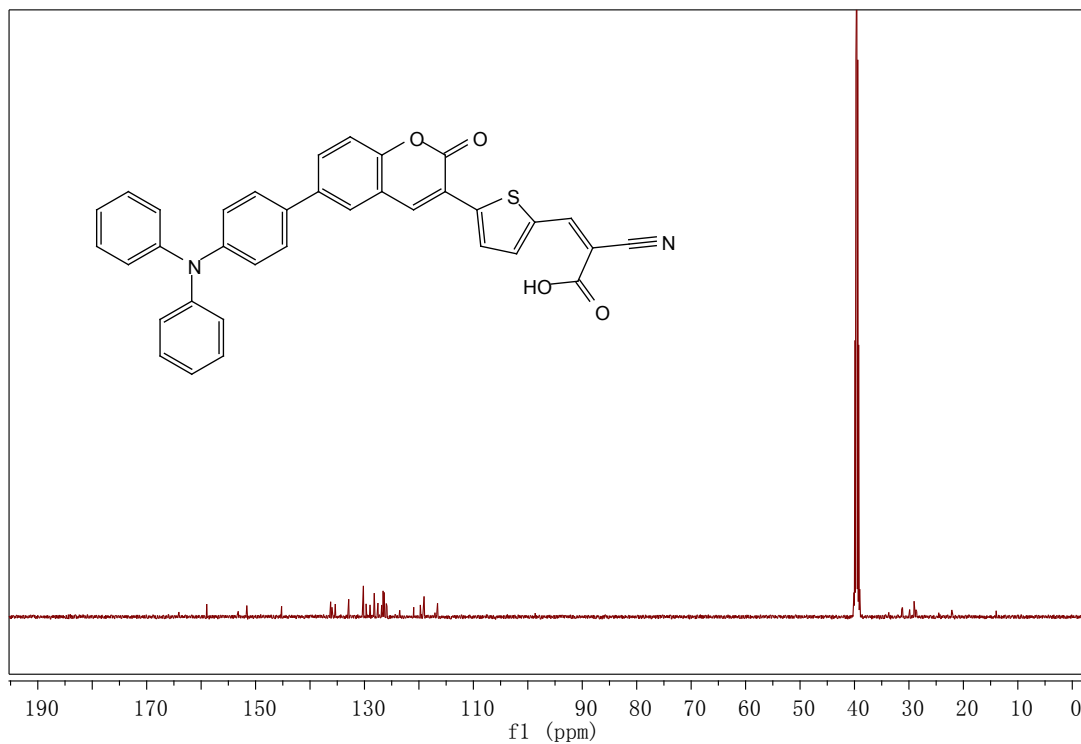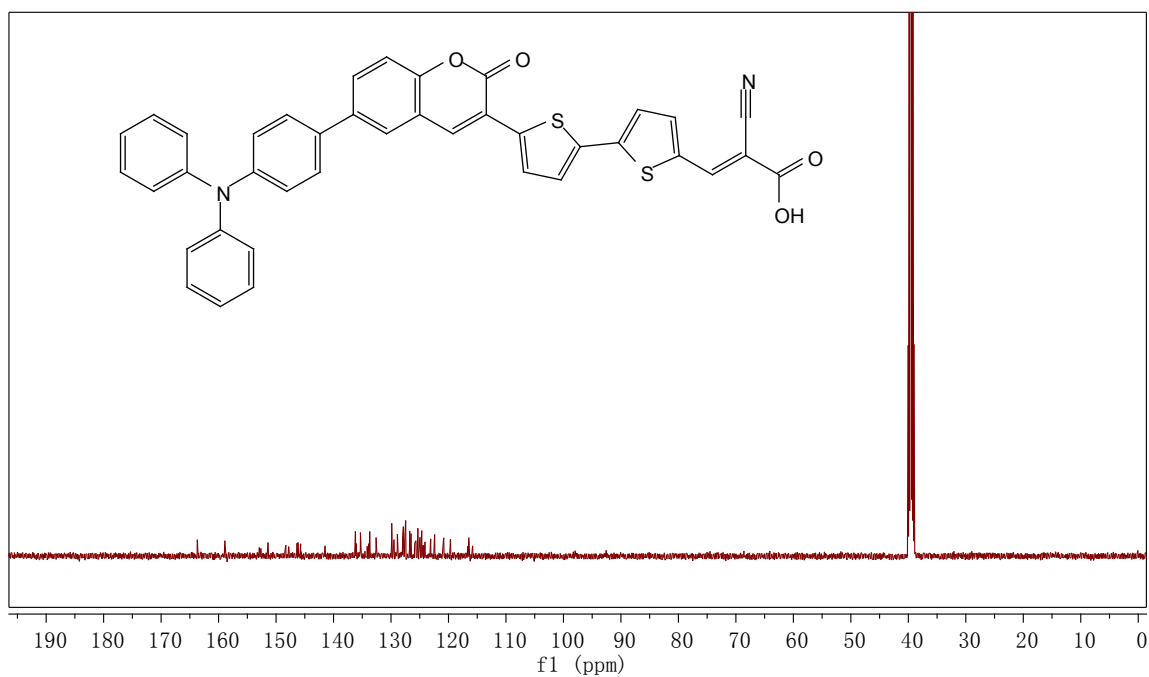

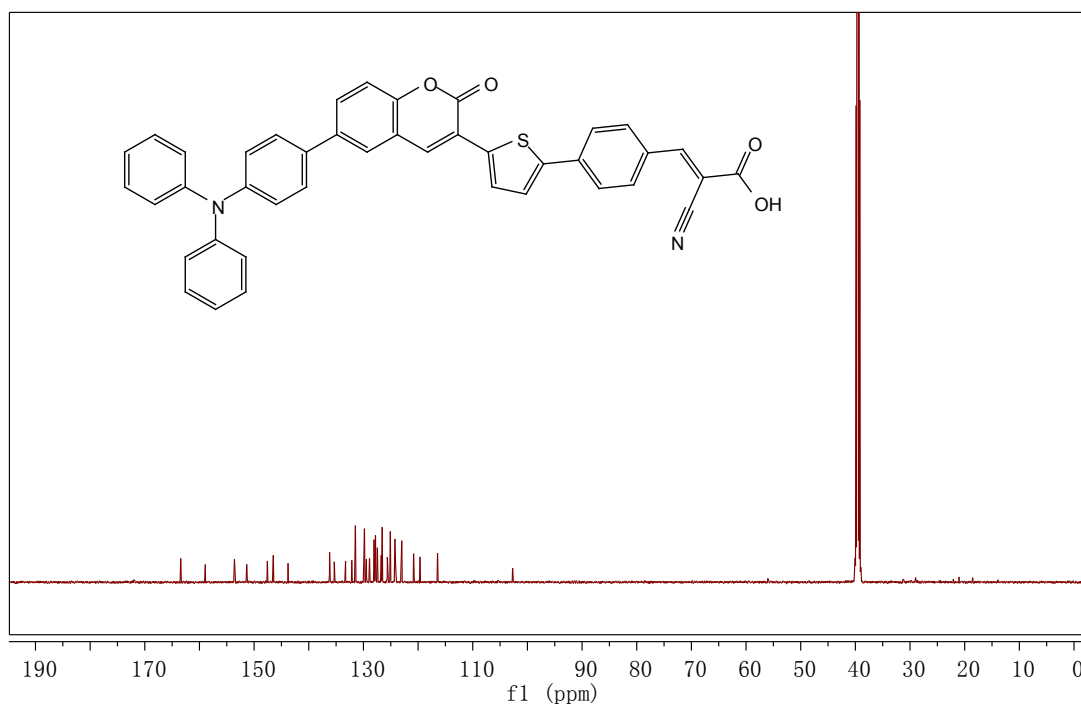

Supplement: c6pp00410e1.pdf [file c6pp00410e1.pdf]
